# Supplementary material for: Recognition of ephedrine enantiomers by molecularly imprinted polymers designed using a computational approach
Source: Royal Society of Chemistry journal article supplement (doi:10.1039/b102426b), 2001-01-01
Supplement: tables.doc [file tables.doc]

Screening of a virtual library of functional monomers on their interaction with ephedrine*.

| **N** | **Binding interactions** | **Binding, kcal/mol** |
| --- | --- | --- |
| 1 | Itaconic acid (charged) – ephedrine (charged) | -64.01 |
| 2 | Itaconic acid (neutral) – ephedrine (neutral) | -33.81 |
| 3 | Itaconic acid (neutral) – ephedrine (charged) | -23.14 |
| 4 | Itaconic acid (charged) – ephedrine (neutral) | -15.94 |
| 5 | Methacrylic acid (charged) – ephedrine (charged) | -58.72 |
| 6 | Methacrylic acid (charged) – ephedrine (neutral) | -26.71 |
| 7 | Methacrylic acid (neutral) – ephedrine (charged) | -22.48 |
| 8 | Methacrylic acid (neutral) – ephedrine (neutral) | -14.62 |
| 9 | Hydroxethyl methacrylate (neutral) – ephedrine (neutral) | -15.72 |
| 10 | Acrylamide (neutral) – ephedrine (neutral) | -13.63 |
| 11 | Allylamine (neutral) – ephedrine (neutral) | -12.02 |
| 12 | Urocanic acid ethyl ester (neutral) – ephedrine (neutral) | -6.59 |
| 13 | Urocanic acid (charged) – ephedrine (neutral) | -5.66 |
| 14 | 4-Vinylpyridine (neutral) – ephedrine (neutral) | -4.99 |
| 15 | Styrene – ephedrine (neutral) – ephedrine (neutral) | -4.80 |
| 16 | 1-Vinylimidazole (neutral) – ephedrine (neutral) | -4.37 |
| 17 | Urocanic acid (neutral) – ephedrine (neutral) | -3.60 |
| 18 | 2-Vinylpyridine (neutral) – ephedrine (neutral) | -1.82 |

*Computer ignored the interaction between monomers and template if they are below the cut-off criteria (-0.2 kcal/mol).

Retention time of the monomers and solvents on a C18 column. The chromatographic experiments were performed on a Luna 15 m C18 column (Phenomenex, UK) using a water-acetonitrile gradient (0-100%). 20 l of the sample (concentration 1 mg/ml) was injected for the analysis. The flow rate was 2 ml/min.

| **Analyte** | **Retention time, min** |
| --- | --- |
| Itaconic acid | 0.99 |
| Methacrylic acid | 2.45 |
| Hydroxyethyl methacrylate | 4.49 |
| Acrylamide | 2.51 |
| 2-Vinylpyridine | 5.73 |
| (-)-Ephedrine | 3.87 |
| Ethylene glycol dimethacrylate | 8.81 |
| Chloroform | 7.92 |
| Tetrahydrofuran | 3.01 |
